# Supplementary material for: Photoelectric cooperative patterning of liquid permeation on the micro/nano hierarchically structured mesh film with low adhesion
Source: Royal Society of Chemistry journal article supplement (doi:10.1039/c4nr03496a), 2014-08-26
Supplement: c4nr03496a1.pdf [file c4nr03496a1.pdf]

## Supporting Information

### **Photoelectric cooperative patterning of liquid permeation on the micro/nano hierarchical structured mesh film with low adhesion**

Zhenyan Guo,<sup>a</sup> Xi Zheng,<sup>a</sup> Dongliang Tian,<sup>\*a</sup> Yanlin Song,<sup>c</sup> Jin Zhai,<sup>a</sup> Xiaofang Zhang,<sup>\*b</sup> Wenxian Li,<sup>d</sup> Xiaolin Wang,<sup>d</sup> Shixue Dou,<sup>d</sup> and Lei Jiang<sup>a,c</sup>

<sup>a</sup>Key Laboratory of Bio-Inspired Smart Interfacial Science and Technology of Ministry of Education, School of Chemistry and Environment, Beihang University, Beijing 100191, P. R. China

<sup>b</sup>School of Mathematics and Physics, University of Science & Technology Beijing, Beijing 100083 P. R. China

<sup>c</sup>Beijing National Laboratory for Molecular Sciences, Key Laboratory of Organic Solids, Institute of Chemistry, Chinese Academy of Sciences, Beijing, 100190, P. R. China

<sup>d</sup>Institute for Superconducting and Electronic Materials, University of Wollongong, NSW 2522, Australia

Email: tiandl@buaa.edu.cn, xfzhang\_926@126.com

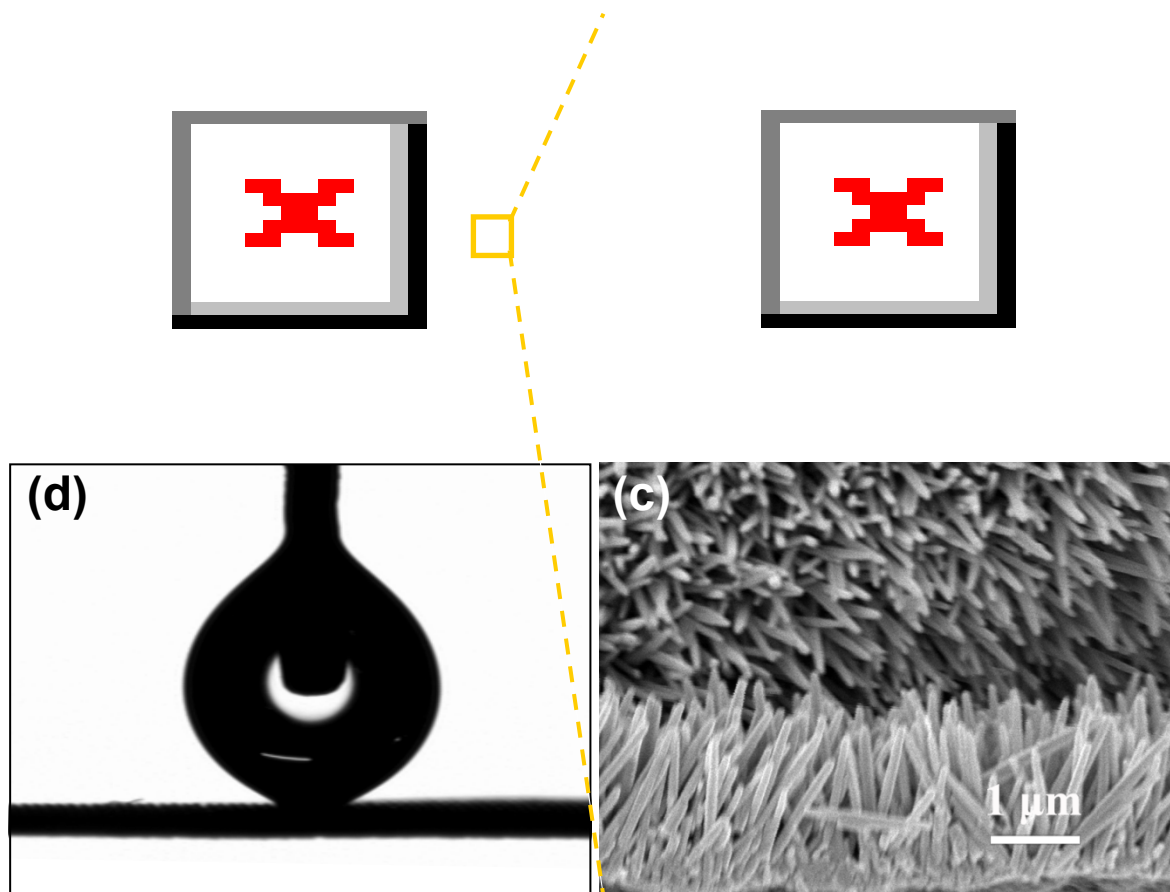

**Fig. S1** SEM images of the micro/nano hierarchical structured ZnO mesh film and the contact angle (CA) photograph of the ZnO mesh film sensitized by N719 dye and treated by FAS. (a) SEM top view of micro/nano hierarchical structured ZnO mesh film. (b) High magnification SEM images of the aligned ZnO nanorod array. (c) SEM side view of the aligned ZnO nanorod array film. (d) The contact angle photograph ( $CA \approx 172^\circ$ ) of the ZnO coated mesh film sensitized by N719 dye and treated by FAS.

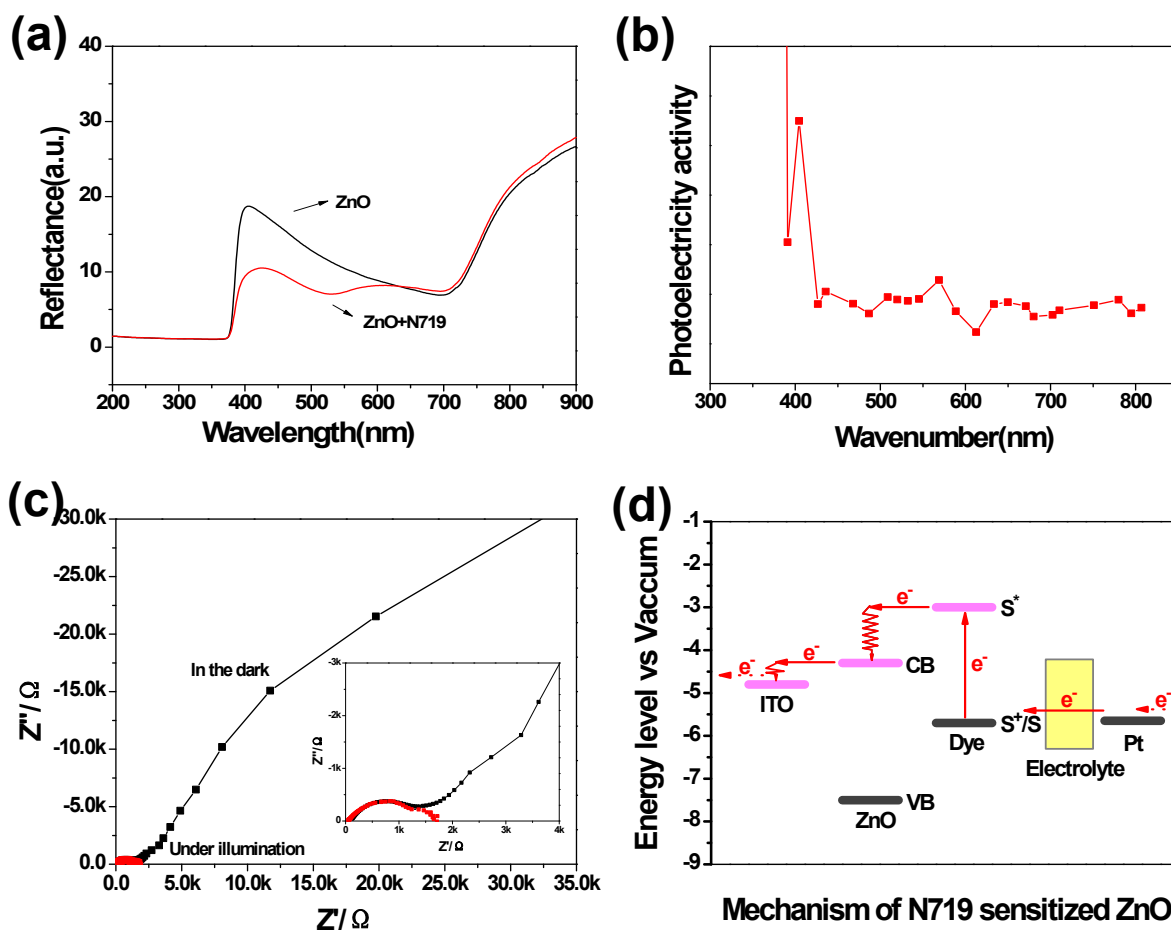

**Fig. S2** Photoelectric properties characterization of the N719 dye sensitized aligned ZnO nanorod array films. (a) UV-vis diffuse-reflectance spectra of the aligned ZnO nanorod array film and the film sensitized by N719-dye. (b) Photocurrent action spectrum of the N719-dye-sensitized aligned ZnO nanorod array film. (c) Nyquist plots of the electrochemical impedance spectra obtained in the dark and under illumination for N719-dye-sensitized aligned ZnO nanorod array film. Inset shows the corresponding enlarged drawing of the high-frequency region. (d) Schematic diagram of the electron transportation process between N719 dye and ZnO.

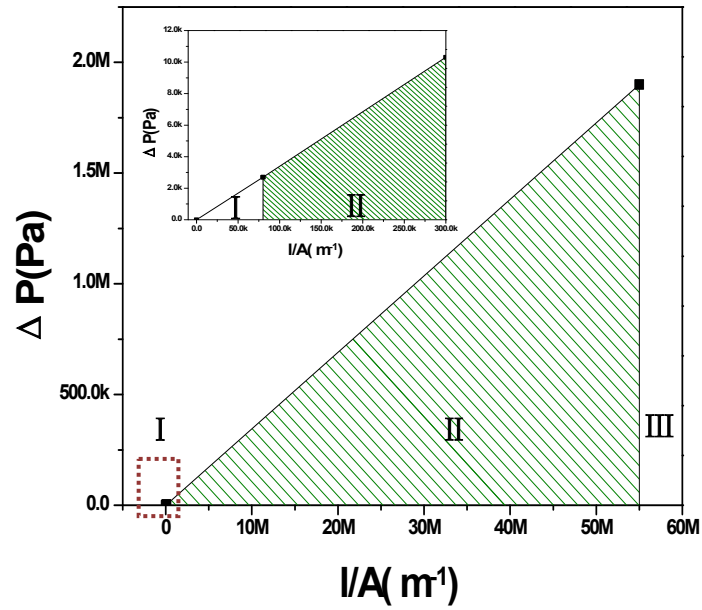

**Fig. S3** The detailed description of  $\Delta P$  versus  $l/A$  relationship. In region I, liquid permeation would not happen; in region II, liquid would only permeate into micro mesh pores, which was the suitable case for liquid reprogaphy; in region III, liquid would further permeate into the spacings between the nanorods. Inset is the enlarging region of I and II.
